# Supplementary material
Source: Springer Nature journal article supplement (https://www.springermedizin.de/resource/supplementary/12958_2014_1234_MOESM1_ESM.pdf/9567118)
Supplement: MOESM1 [file 9567118]

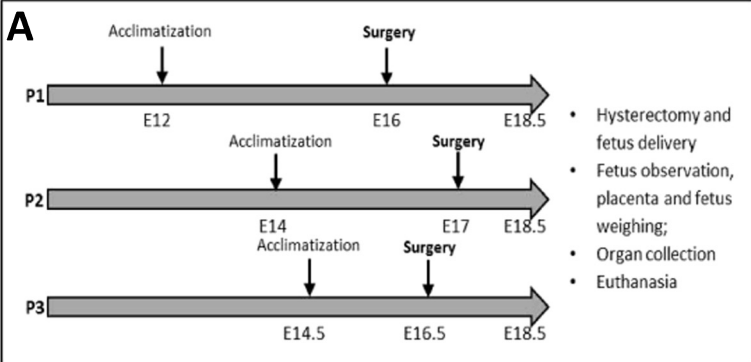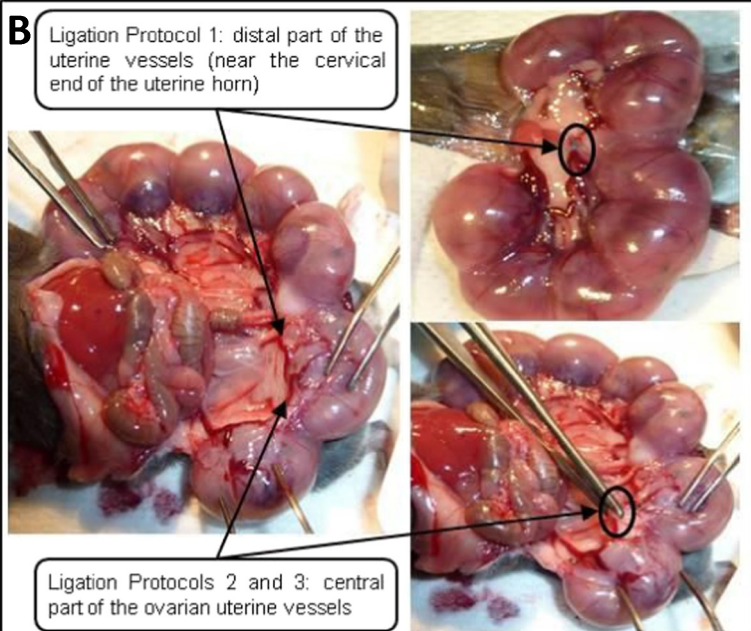

**C**

|                                                                                                         | Ctrl          |                | Test          |                |
|---------------------------------------------------------------------------------------------------------|---------------|----------------|---------------|----------------|
|                                                                                                         | Mothers<br>n= | Fetuses*<br>n= | Mothers<br>n= | Fetuses*<br>n= |
| Protocol1: ligation at E16 (around the cervical end of each uterine horn) or sham procedure (control)   | 3             | 24             | 8             | 46             |
| Protocol2: ligation at E17 (around the central part of each uterine horn) or sham procedure (control)   | 3             | 20             | 8             | 52             |
| Protocol3: ligation at E16.5 (around the central part of each uterine horn) or sham procedure (control) | 4             | 32             | 12            | 104            |
